# Supplementary material for: Didymorenloids A and B, two polycyclic cyclopenta[b]fluorene-type alkaloids with anti-hepatoma activity from the mangrove endophytic fungus Didymella sp. CYSK-4
Source: Royal Society of Chemistry journal article supplement (doi:10.1039/d3qo01917a), 2024-01-01
Supplement: d3qo01917a2.pdf [file d3qo01917a2.pdf]

## Supporting Information

Didymorenoids A-B, two polycyclic cyclopenta[b]fluorene-type alkaloids with anti-hepatoma activity from the mangrove endophytic fungus *Didymella* sp. CYSK-4

Yan Chen,<sup>‡a,b</sup> Wencong Yang,<sup>‡c</sup> Ge Zhu,<sup>‡d</sup> Guisheng Wang,<sup>b</sup> Tao Chen,<sup>b</sup> Hang Li,<sup>c</sup> Jie Yuan,<sup>\*d</sup> Zhigang She,<sup>\*b</sup>

<sup>a</sup>*School of Pharmacy, Anhui Medical University, Hefei, 230032, P.R. China*

<sup>b</sup>*School of Chemistry, Sun Yat-sen University, Guangzhou, 510275, P.R. China*

<sup>c</sup>*School of Pharmaceutical Sciences, Sun Yat-sen University, Guangzhou, 510006, P.R. China*

<sup>d</sup>*Department of Biochemistry, Zhongshan School of Medicine, Sun Yat-sen University, Guangzhou, 510080, P.R. China*

<sup>‡</sup>*These authors contributed equally to this work.*

<sup>\*</sup>*Corresponding authors.*

*E-mail addresses: yuanjie@mail.sysu.edu.cn (J. Yuan), ceshzhg@mail.sysu.edu.cn (Z. She).*

## Content

- Figure S1  $^1\text{H}$  NMR of **1** in  $\text{DMSO-}d_6$  (400 MHz)  
Figure S2  $^{13}\text{C}$  NMR of **1** in  $\text{DMSO-}d_6$  (100 MHz)  
Figure S3 DEPT135 of **1** in  $\text{DMSO-}d_6$  (100 MHz)  
Figure S4 HSQC spectrum of **1** in  $\text{DMSO-}d_6$   
Figure S5 HMBC spectrum of **1** in  $\text{DMSO-}d_6$   
Figure S6 COSY spectrum of **1** in  $\text{DMSO-}d_6$   
Figure S7 NOESY spectrum of **1** in  $\text{DMSO-}d_6$   
Figure S8 HR-ESI-MS spectrum of **1**  
Figure S9 UV spectrum of compound **1** in MeOH  
Figure S10 IR spectrum of compound **1**  
Figure S11  $^1\text{H}$  NMR of **2** in  $\text{CD}_3\text{OD}$  (400 MHz)  
Figure S12  $^{13}\text{C}$  NMR of **2** in  $\text{CD}_3\text{OD}$  (100 MHz)  
Figure S13 HSQC spectrum of **2** in  $\text{CD}_3\text{OD}$   
Figure S14 HMBC spectrum of **2** in  $\text{CD}_3\text{OD}$   
Figure S15 COSY spectrum of **2** in  $\text{CD}_3\text{OD}$   
Figure S16 NOESY spectrum of **2** in  $\text{CD}_3\text{OD}$   
Figure S17 HR-ESI-MS spectrum of **2**  
Figure S18 UV spectrum of compound **2** in MeOH  
Figure S19 IR spectrum of compound **2**  
Figure S20 The total clusters of extracts from the strain *Didymella* sp. CYSK-4 generated by GNPS  
Figure S21 Optimized low-energy conformers of **1a-1f** at the B3LYP/6-31G(d) level  
Table S1. Energy analysis for the conformers of **1a-1f**  
Table S2. Cartesian coordinates of conformer **1b**

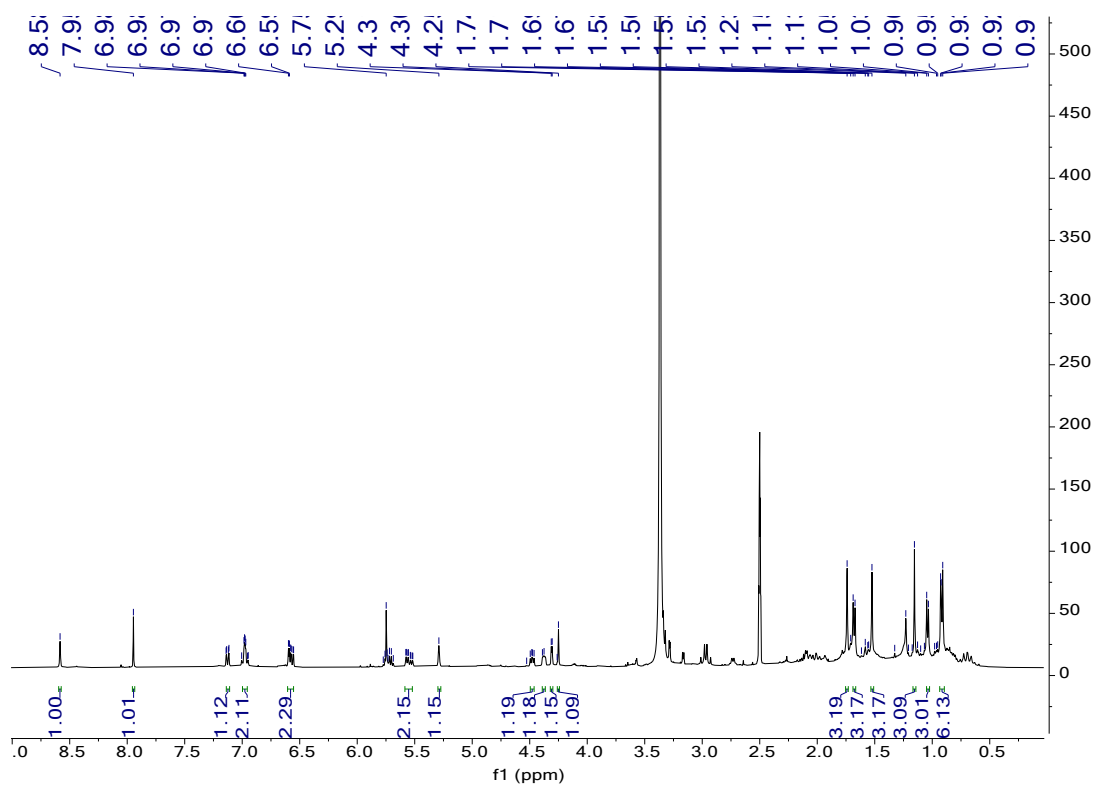

Figure S1  $^1\text{H}$  NMR of 1 in  $\text{DMSO-}d_6$  (400 MHz)

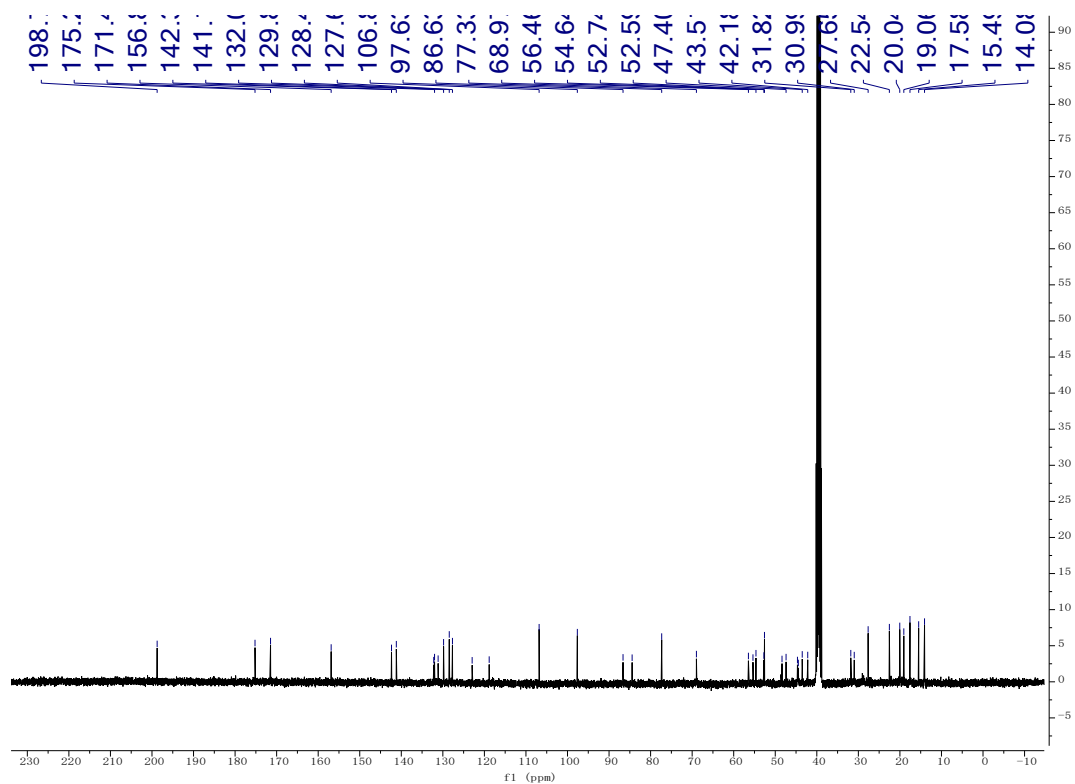

Figure S2  $^{13}\text{C}$  NMR of 1 in  $\text{DMSO-}d_6$  (100 MHz)

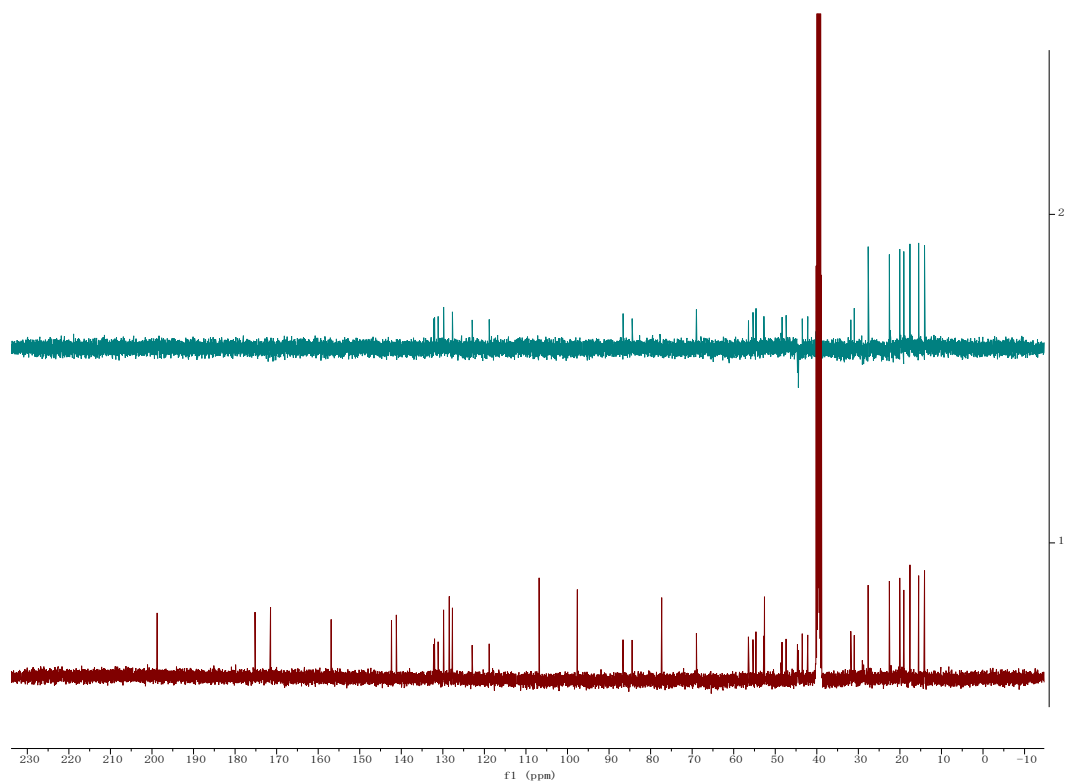

Figure S3 DEPT135 of **1** in DMSO- $d_6$  (100 MHz)

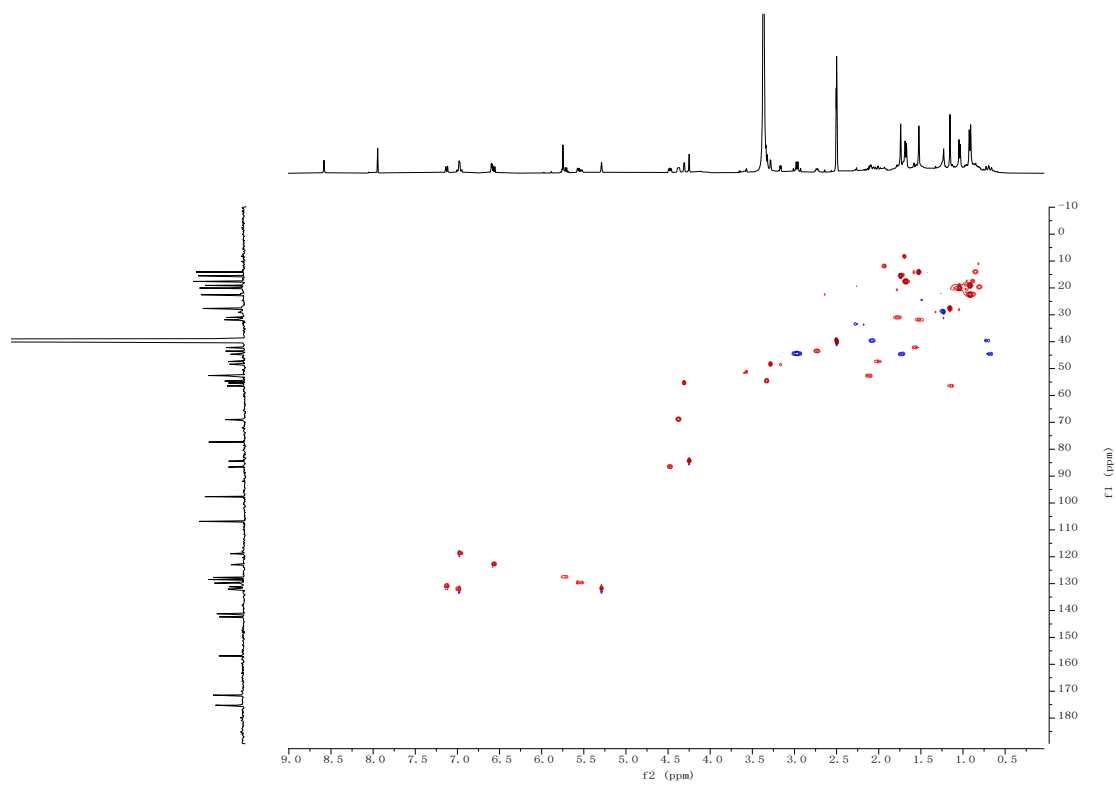

Figure S4 HSQC spectrum of **1** in DMSO- $d_6$

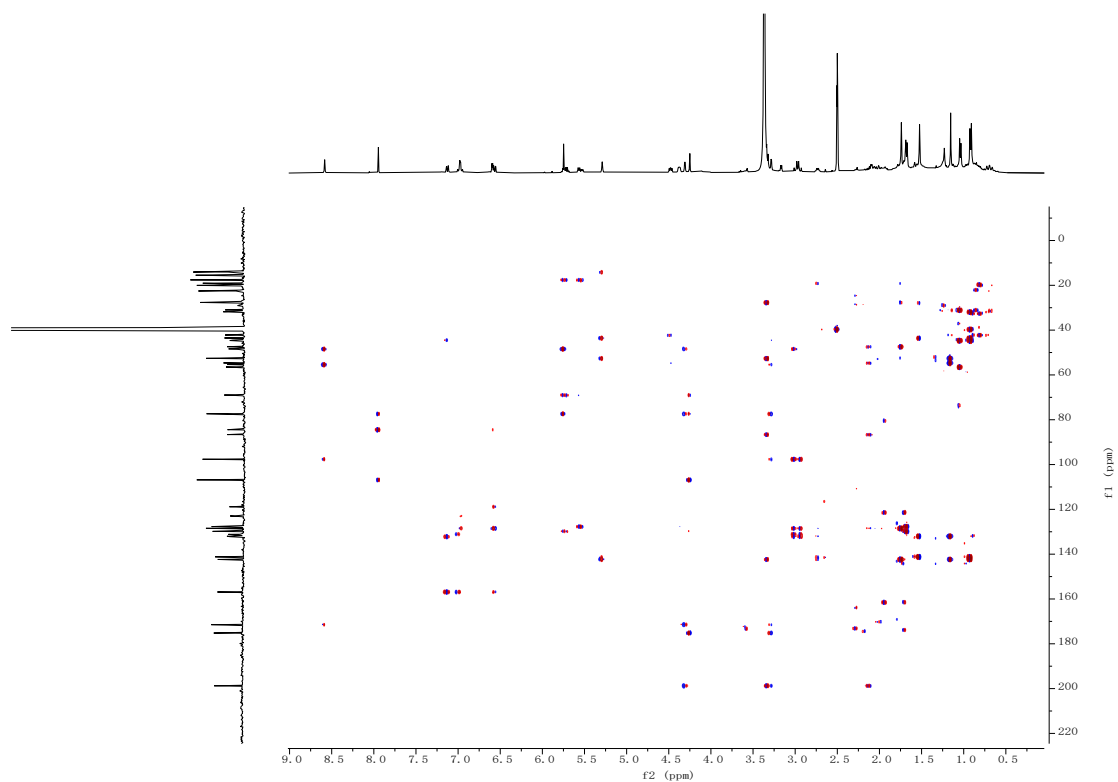

Figure S5 HMBC spectrum of **1** in DMSO- $d_6$

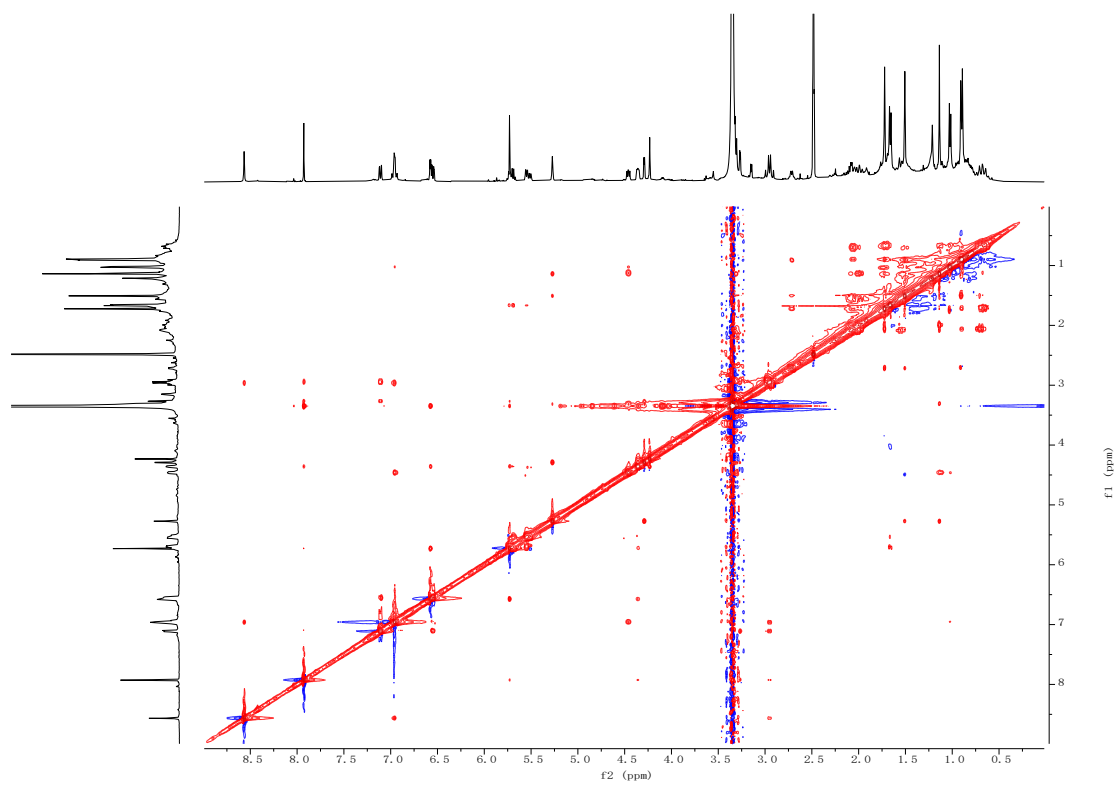

Figure S6 COSY spectrum of **1** in DMSO- $d_6$

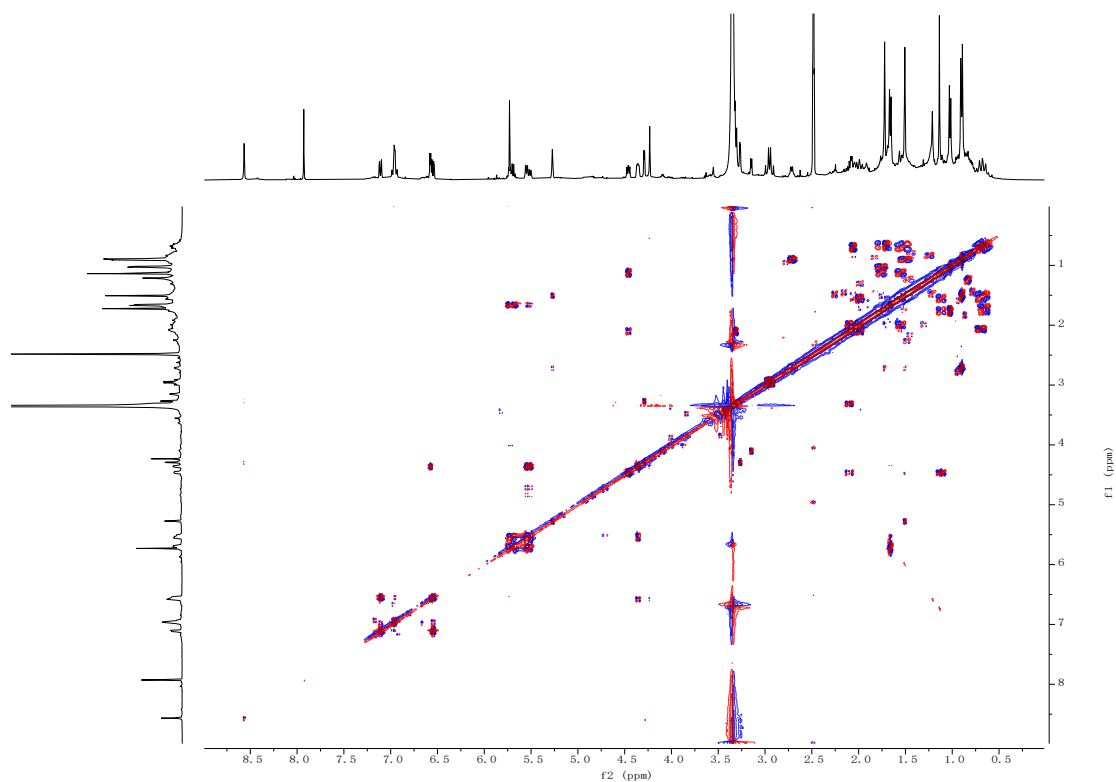

Figure S7 NOESY spectrum of **1** in DMSO- $d_6$

2SK4-8POS #11 RT: 0.04769 AV: 1 NL: 4.60E7  
T: FTMS + p ESI Full ms [100.0000-1050.0000]

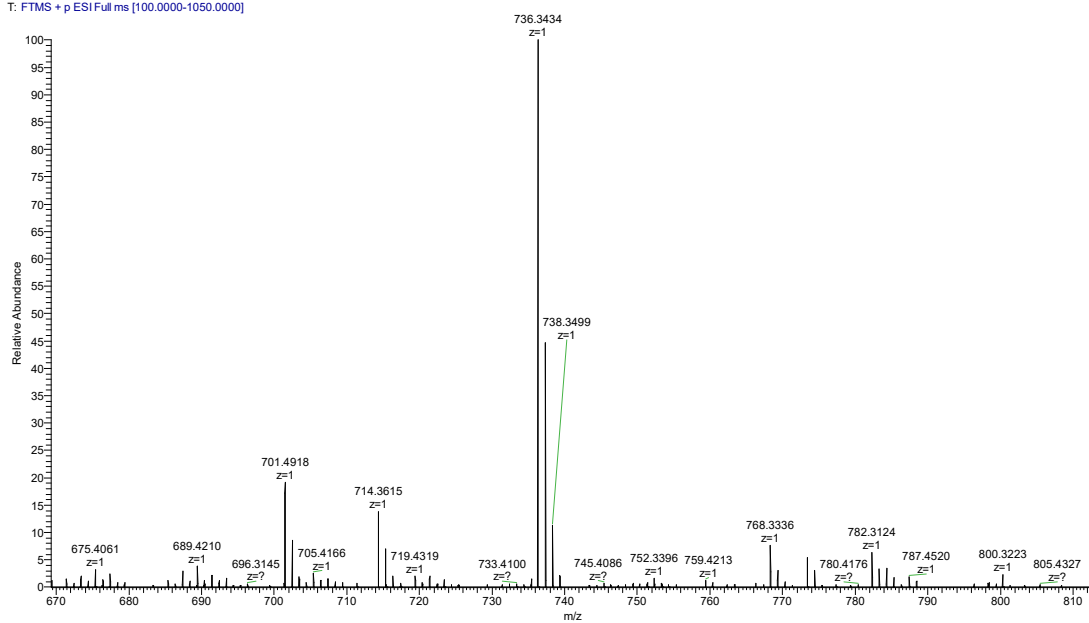

Figure S8 HR-ESI-MS spectrum of **1**

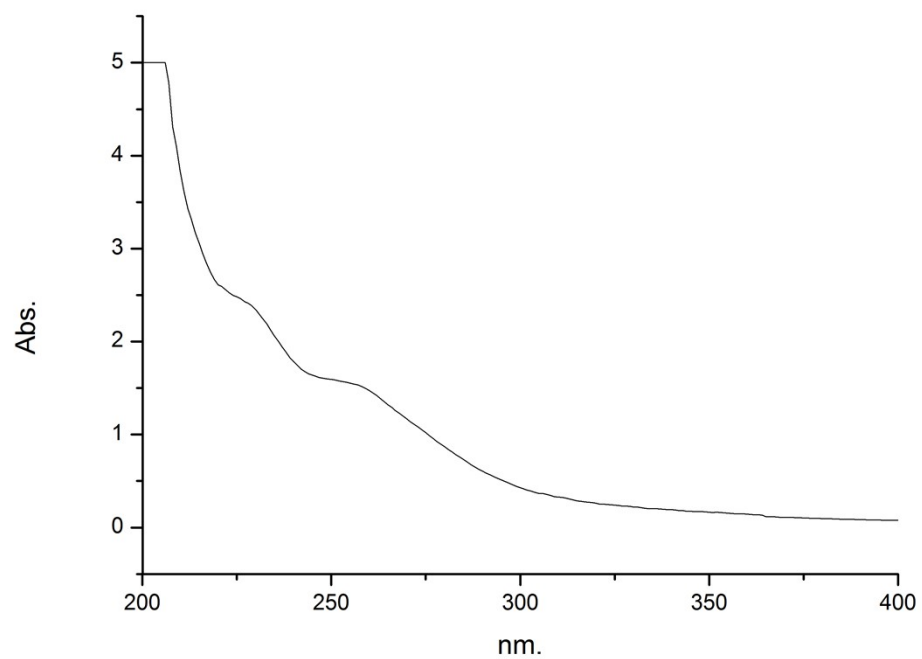

Figure S9 UV spectrum of compound **1** in MeOH

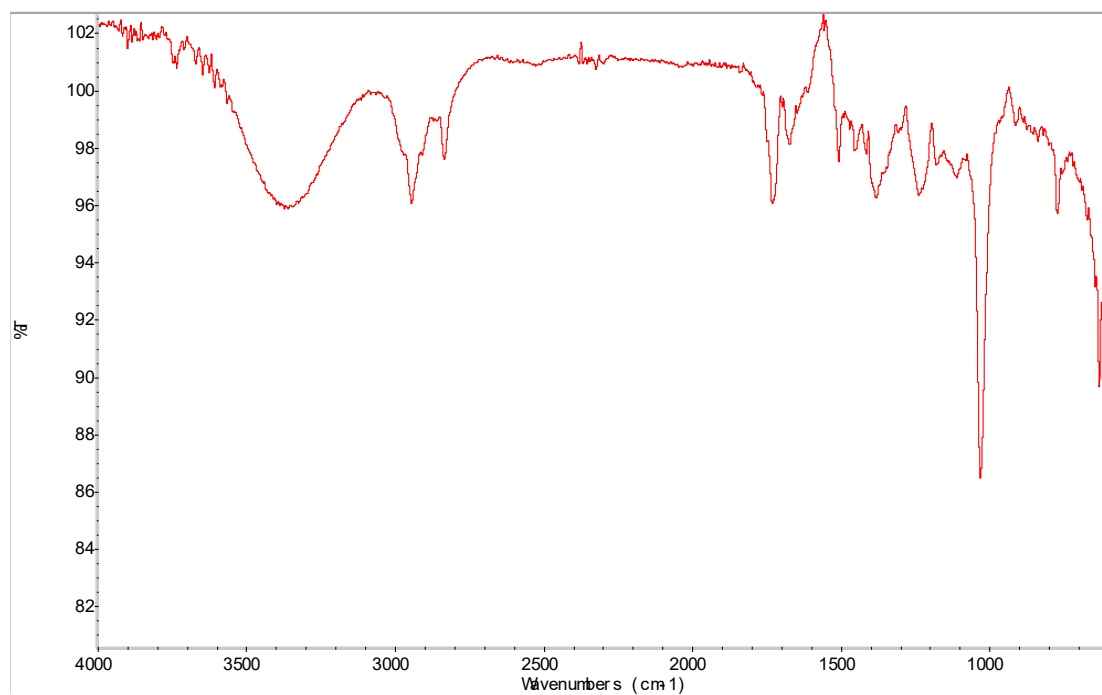

Figure S10 IR spectrum of compound **1**

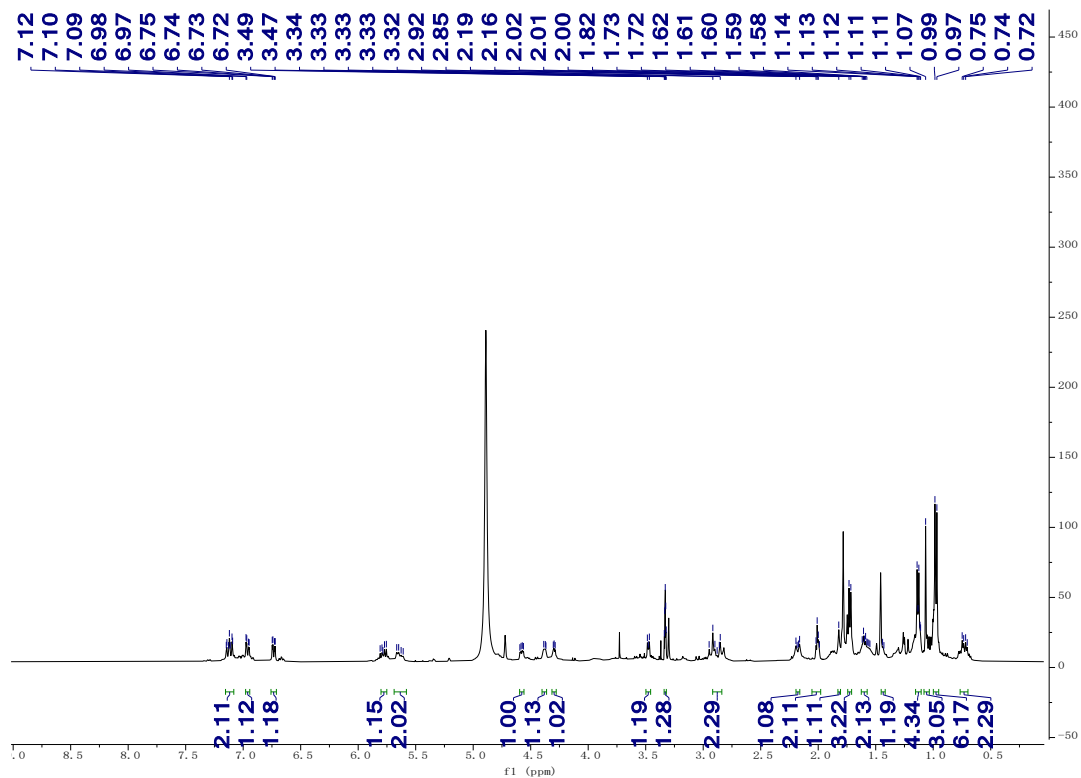

Figure S11  $^1\text{H}$  NMR of **2** in  $\text{CD}_3\text{OD}$  (400 MHz)

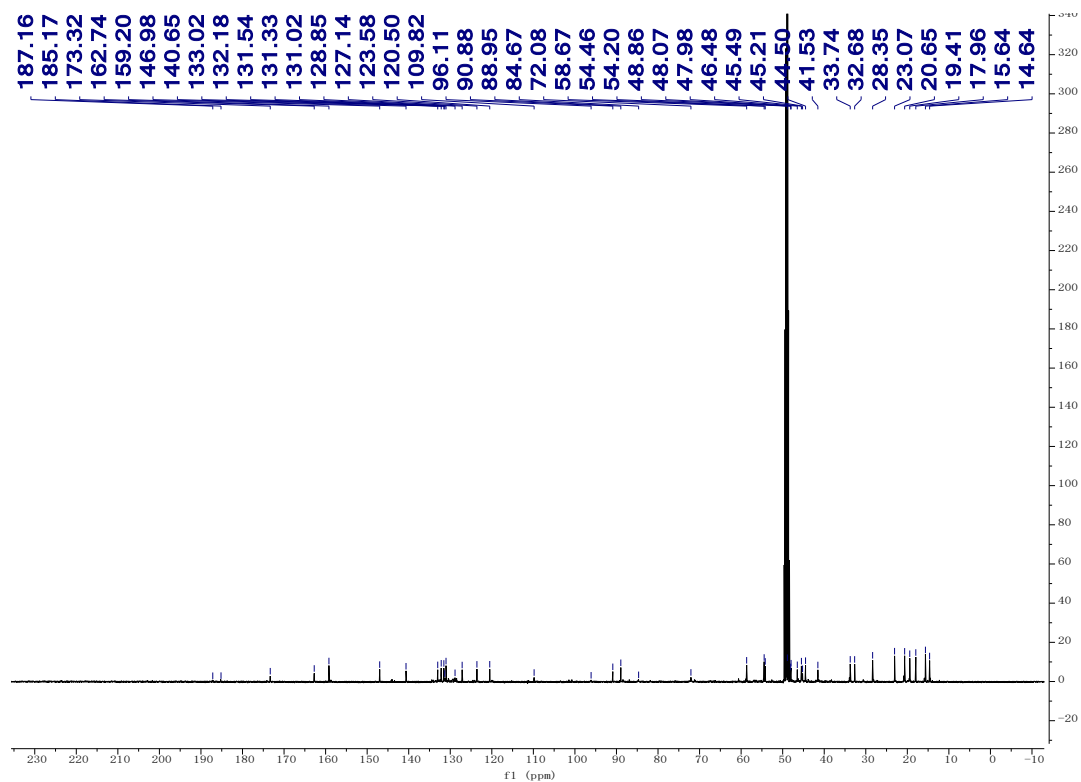

Figure S12  $^{13}\text{C}$  NMR of **2** in  $\text{CD}_3\text{OD}$  (400 MHz)



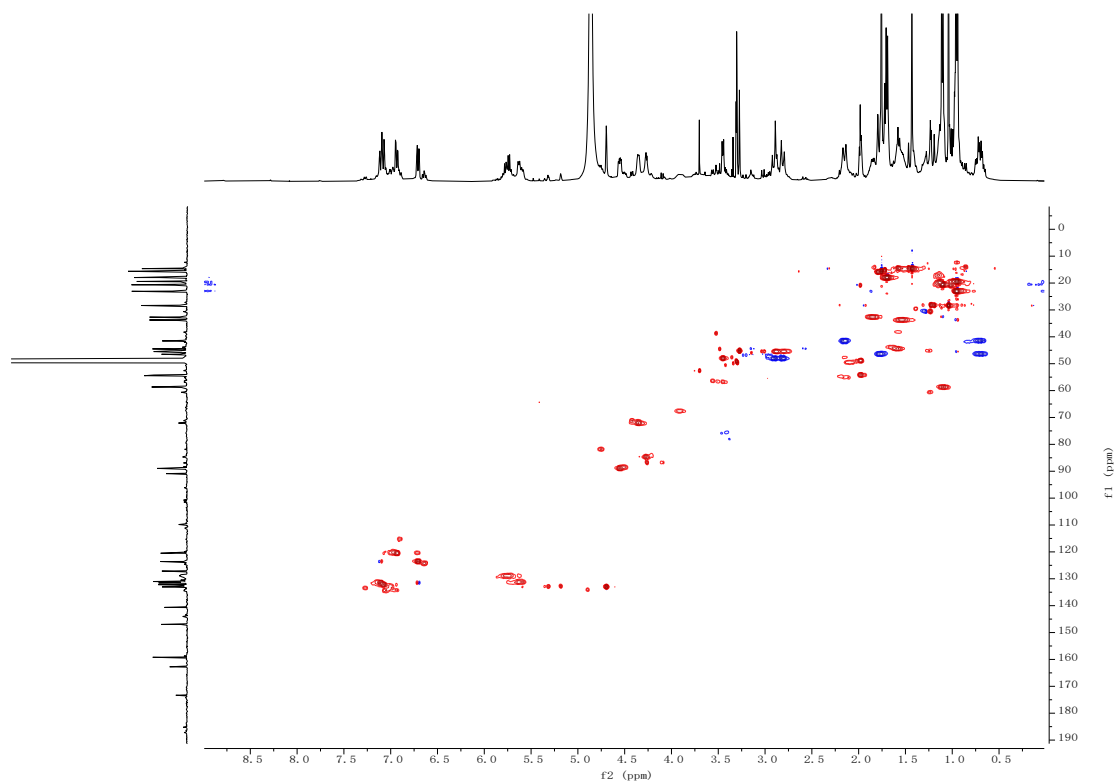

Figure S13 HSQC spectrum of **2** in CD<sub>3</sub>OD

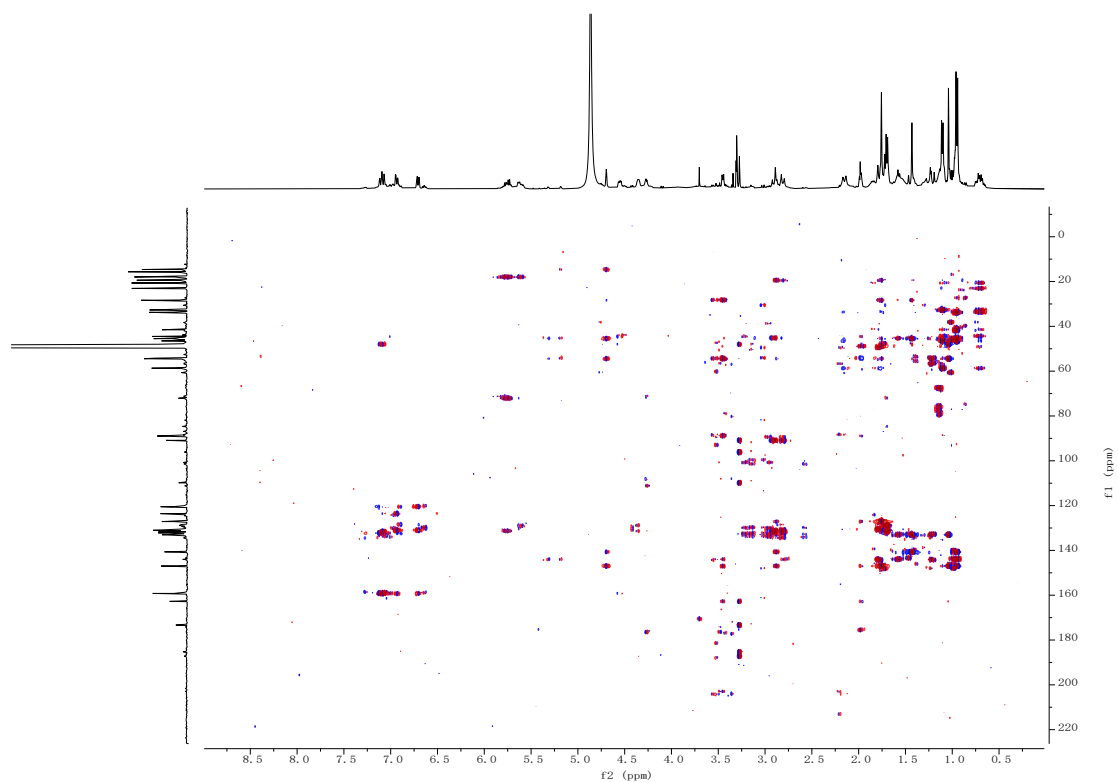

Figure S14 HMBC spectrum of **2** in CD<sub>3</sub>OD

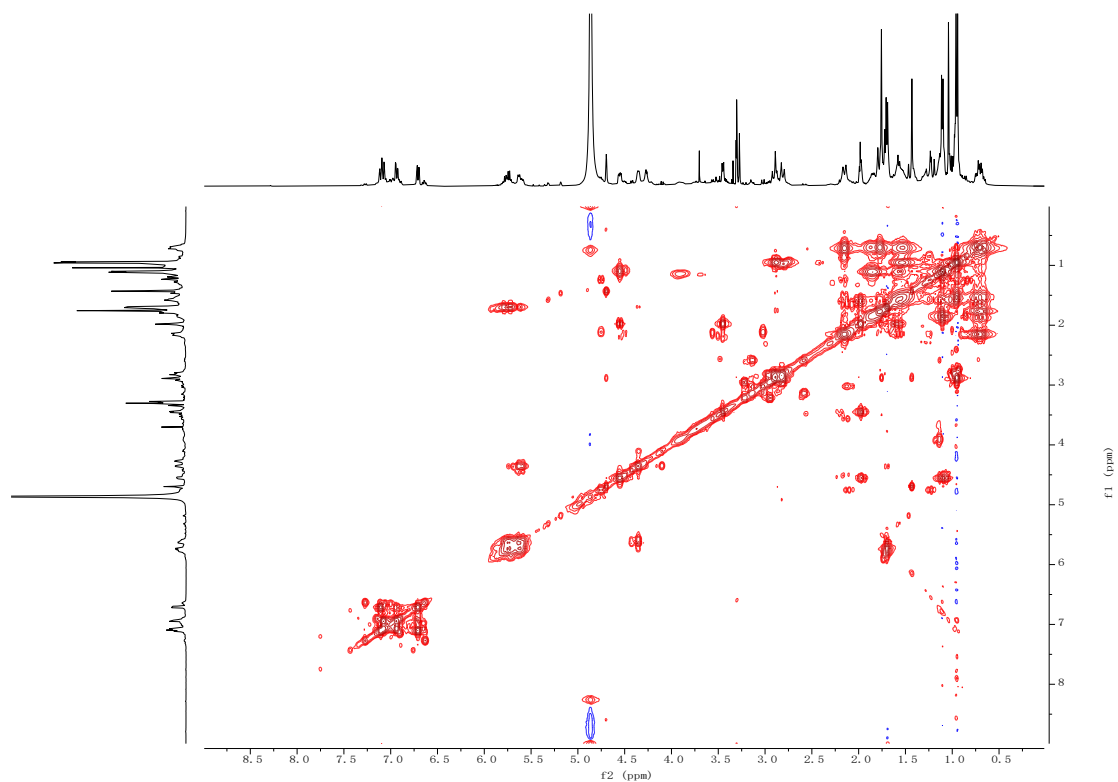

Figure S15 COSY spectrum of **2** in CD<sub>3</sub>OD

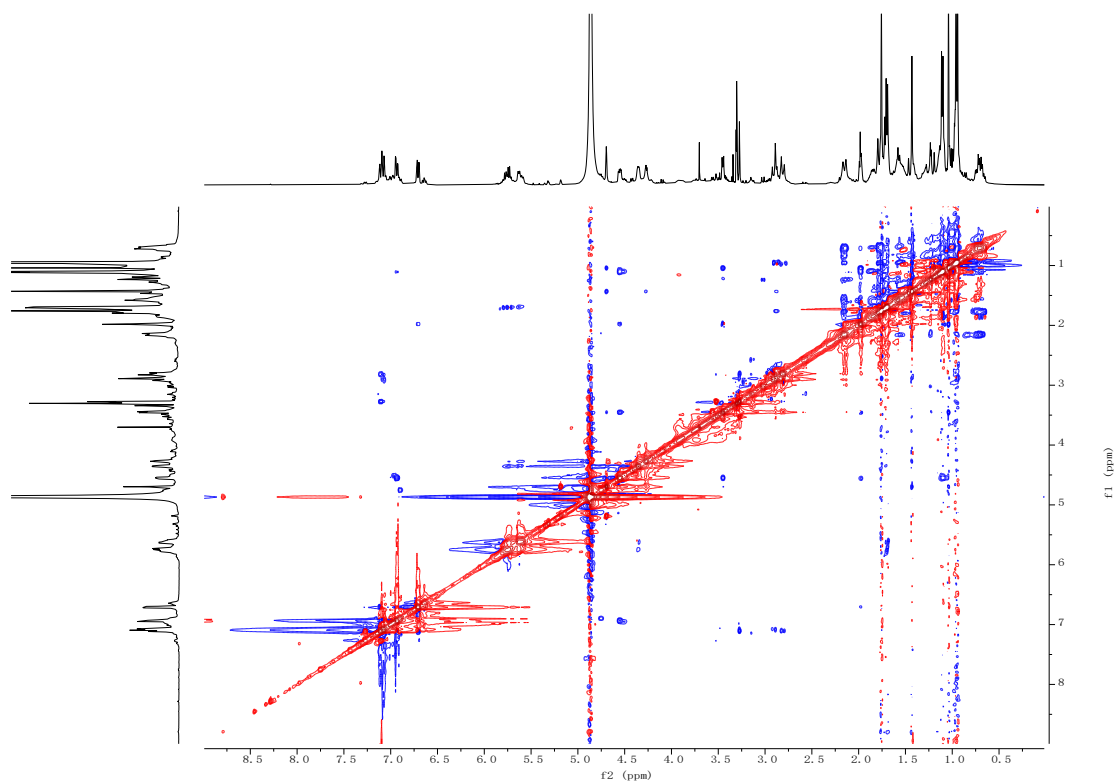

Figure S16 NOESY spectrum of **2** in CD<sub>3</sub>OD

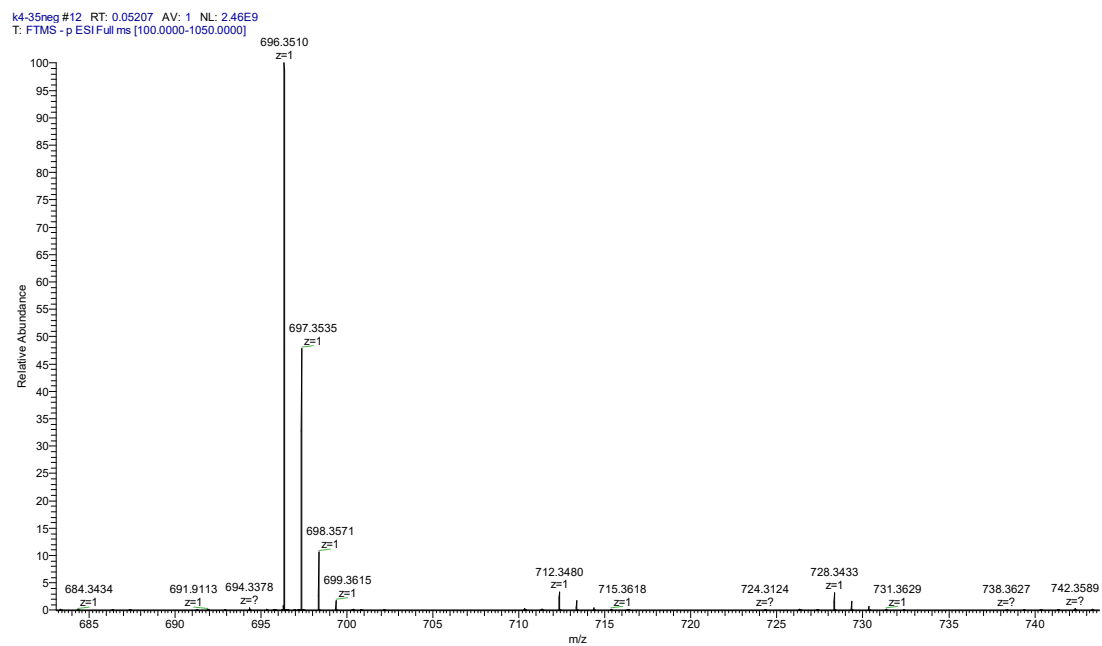

Figure S17 HR-ESI-MS spectrum of **2**

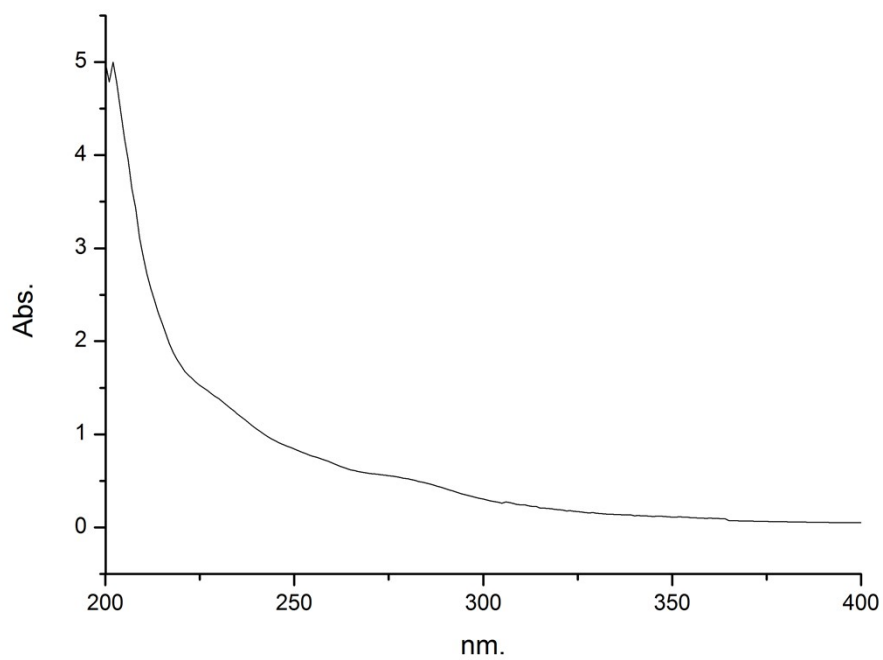

Figure S18 UV spectrum of compound **2** in MeOH

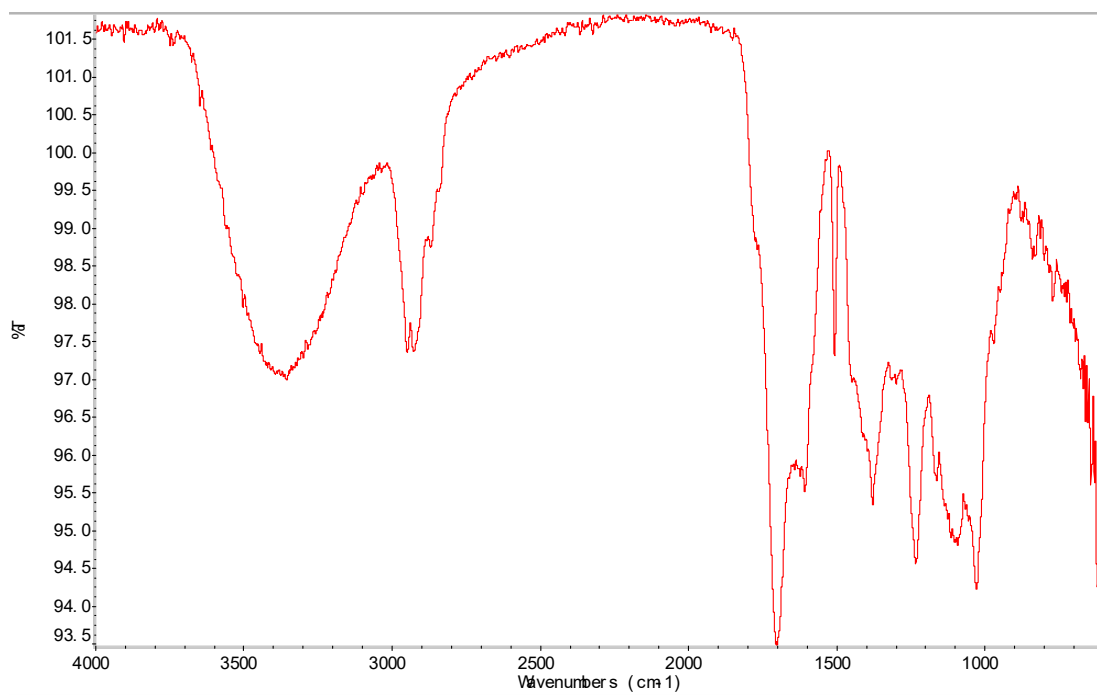

Figure S19 IR spectrum of compound **2**

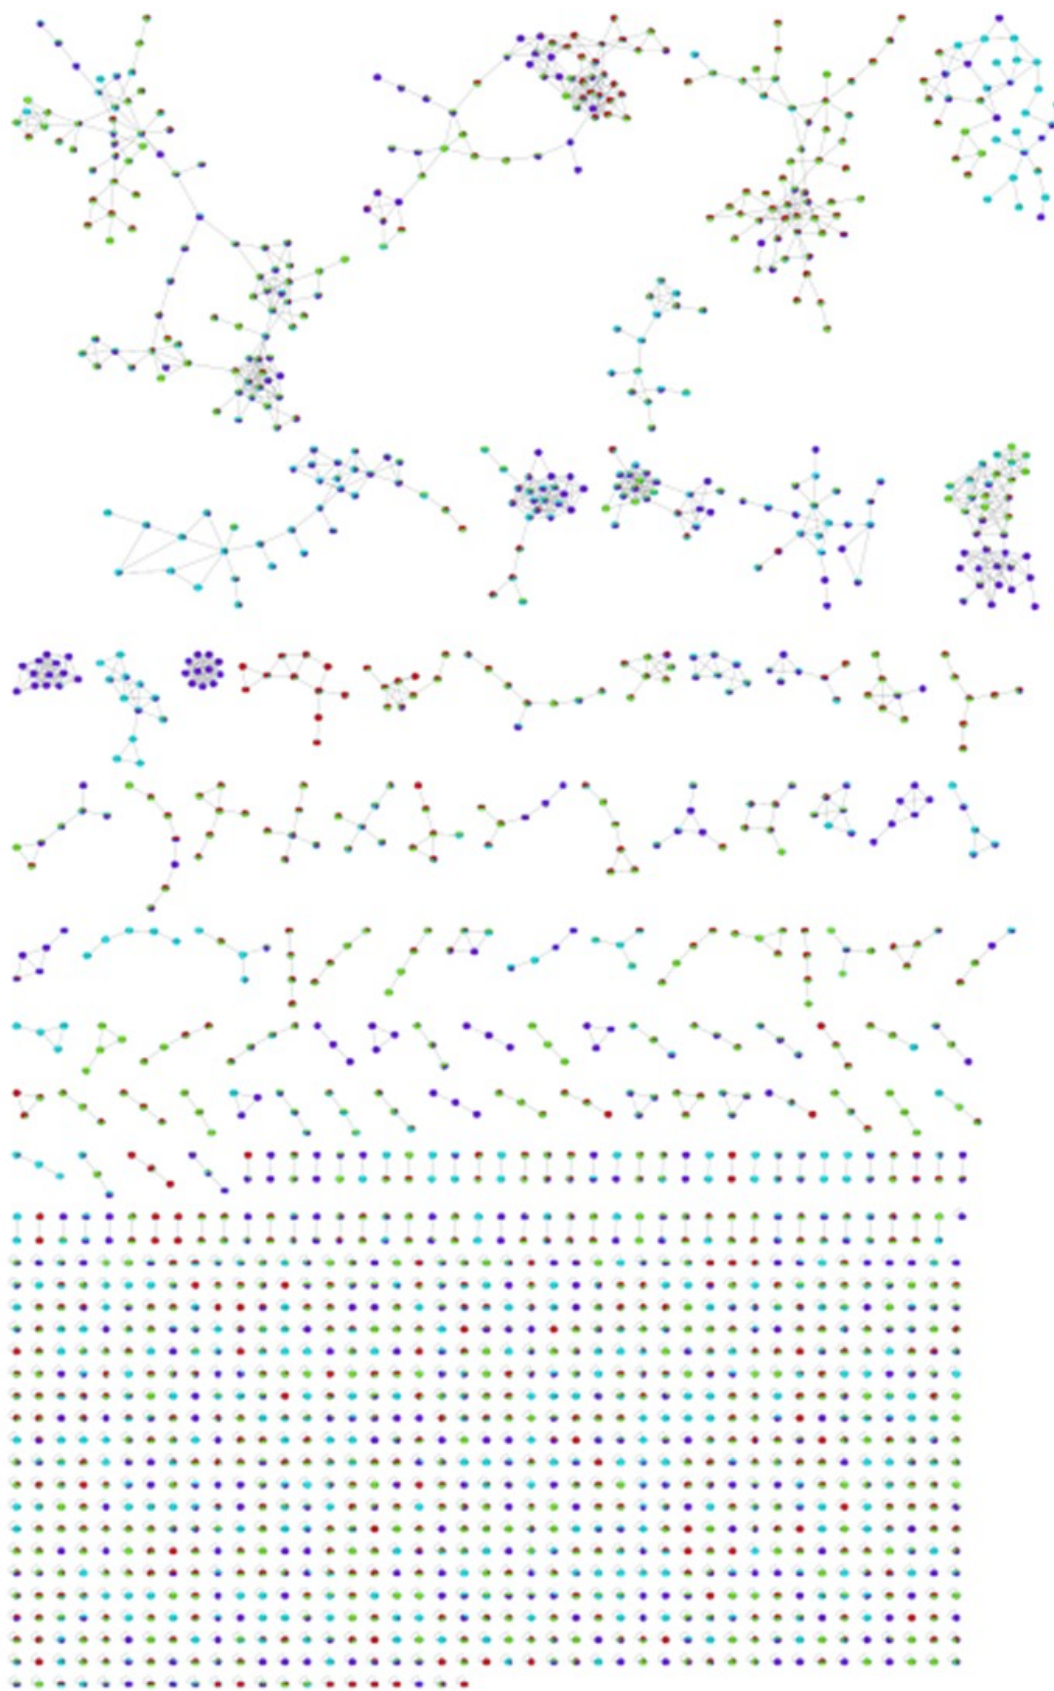

Figure S20. The total clusters of extracts from the strain *Didymella* sp. CYSK-4 generated by GNPS

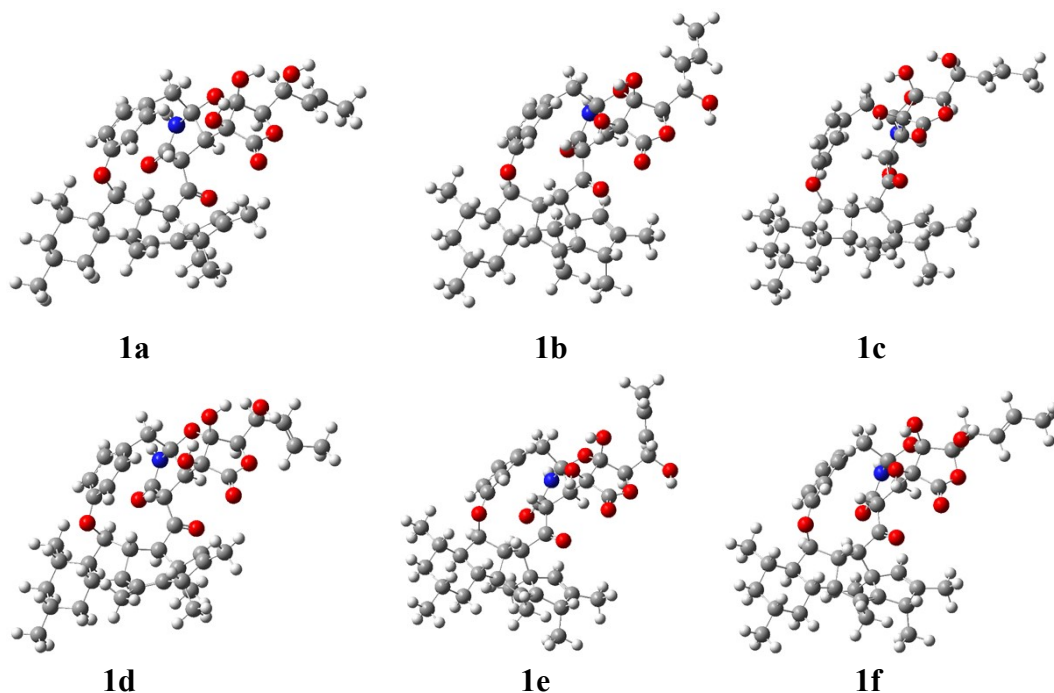

**Figure S21.** Optimized low-energy conformers of **1a-1f** at the B3LYP/6-31G(d) level.

**Table S1.** Energy analysis for the conformers of **1a-1f**.

| Conformation | E(Hartree)  | E(kcal/mol) | rel.E(kcal/mol) | Q (i)     | Boltzmann Dist |
|--------------|-------------|-------------|-----------------|-----------|----------------|
| <b>1a</b>    | -2362.84936 | -1482694.82 | 1.522824        | 0.0763886 | 3.18%          |
| <b>1b</b>    | -2362.85178 | -1482696.34 | 0               | 1         | 41.61%         |
| <b>1c</b>    | -2362.85088 | -1482695.78 | 0.565317        | 0.3848994 | 16.01%         |
| <b>1d</b>    | -2362.85060 | -1482695.61 | 0.739010        | 0.2870422 | 11.94%         |
| <b>1e</b>    | -2362.85046 | -1482695.51 | 0.830311        | 0.2460239 | 10.24%         |
| <b>1f</b>    | -2362.85094 | -1482695.82 | 0.529173        | 0.4091273 | 17.02%         |

**Table S2.** Cartesian coordinates of conformer **1b**.

| Center Number | Standard Orientation (Ångstroms) |      |           |          |          |
|---------------|----------------------------------|------|-----------|----------|----------|
|               | Atom                             | Type | X         | Y        | Z        |
| 1             | 6                                | 0    | -2.652789 | 0.044222 | 0.152282 |
| 2             | 6                                | 0    | -3.89223  | 0.991374 | 0.04885  |
| 3             | 6                                | 0    | -3.45526  | 2.348991 | -0.46191 |
| 4             | 6                                | 0    | -2.46195  | 2.91342  | 0.245344 |
| 5             | 6                                | 0    | -1.78682  | 2.173817 | 1.408363 |
| 6             | 6                                | 0    | -1.48581  | 0.666    | 1.001372 |
| 7             | 6                                | 0    | -3.2835   | -1.34381 | 0.544989 |
| 8             | 6                                | 0    | -4.80716  | -1.16567 | 0.289102 |
| 9             | 6                                | 0    | -4.91842  | 0.074246 | -0.63153 |
| 10            | 6                                | 0    | -1.74999  | 4.236315 | -0.01483 |
| 11            | 6                                | 0    | -0.52474  | 4.137851 | 0.882777 |
| 12            | 6                                | 0    | -0.54756  | 3.024145 | 1.620843 |

|    |   |   |          |          |          |
|----|---|---|----------|----------|----------|
| 13 | 6 | 0 | -5.63913 | -2.36322 | -0.19496 |
| 14 | 6 | 0 | -7.09632 | -1.88876 | -0.39706 |
| 15 | 6 | 0 | -7.24991 | -0.63411 | -1.27834 |
| 16 | 6 | 0 | -6.37524 | 0.522497 | -0.75079 |
| 17 | 6 | 0 | -5.59222 | -3.55446 | 0.771648 |
| 18 | 6 | 0 | -8.72046 | -0.21817 | -1.40423 |
| 19 | 6 | 0 | -4.07037 | 2.94686  | -1.70053 |
| 20 | 6 | 0 | 0.543215 | 5.189847 | 0.883008 |
| 21 | 6 | 0 | -2.61349 | 5.479481 | 0.293713 |
| 22 | 6 | 0 | -2.57398 | 2.179852 | 2.748991 |
| 23 | 1 | 0 | -5.23665 | -0.85884 | 1.257071 |
| 24 | 1 | 0 | -4.55569 | -0.20046 | -1.63498 |
| 25 | 1 | 0 | -4.28657 | 1.140941 | 1.060979 |
| 26 | 6 | 0 | 2.258685 | -0.46073 | 0.060575 |
| 27 | 6 | 0 | 0.826731 | -0.48147 | 0.597303 |
| 28 | 6 | 0 | -1.07755 | -3.2989  | 1.180314 |
| 29 | 6 | 0 | -1.57861 | -2.94648 | -0.08189 |
| 30 | 6 | 0 | -0.76783 | -3.13169 | -1.20901 |
| 31 | 6 | 0 | 0.587875 | -3.39672 | -1.04596 |
| 32 | 6 | 0 | 1.161601 | -3.47538 | 0.234653 |
| 33 | 6 | 0 | 0.285811 | -3.56311 | 1.328281 |
| 34 | 6 | 0 | -0.16155 | 0.611369 | 0.223168 |
| 35 | 8 | 0 | -2.83149 | -2.43847 | -0.29222 |
| 36 | 1 | 0 | -2.30031 | -0.0752  | -0.87997 |
| 37 | 8 | 0 | 0.072101 | 1.30984  | -0.74585 |
| 38 | 6 | 0 | 2.92096  | -1.6486  | 0.80328  |
| 39 | 7 | 0 | 2.428672 | -1.34453 | 2.132696 |
| 40 | 6 | 0 | 1.158866 | -0.77653 | 2.095298 |
| 41 | 6 | 0 | 2.987621 | -0.46689 | -1.28114 |
| 42 | 6 | 0 | 4.434304 | -0.80291 | -0.73998 |
| 43 | 8 | 0 | 4.31058  | -1.41027 | 0.563815 |
| 44 | 6 | 0 | 2.629911 | -3.15249 | 0.409818 |
| 45 | 6 | 0 | 3.214652 | 0.882083 | -1.95835 |
| 46 | 8 | 0 | 4.304905 | 1.490714 | -1.44751 |
| 47 | 6 | 0 | 5.098663 | 0.593151 | -0.59562 |
| 48 | 8 | 0 | 5.126919 | -1.6062  | -1.63044 |
| 49 | 8 | 0 | 2.568996 | -1.39542 | -2.25418 |
| 50 | 8 | 0 | 2.577477 | 1.299571 | -2.89148 |
| 51 | 6 | 0 | 6.563537 | 0.735958 | -1.04296 |
| 52 | 6 | 0 | 7.470369 | -0.08882 | -0.16793 |
| 53 | 6 | 0 | 8.391242 | 0.421481 | 0.651693 |
| 54 | 8 | 0 | 6.929895 | 2.104867 | -0.96906 |
| 55 | 6 | 0 | 9.30232  | -0.39387 | 1.522828 |

|    |   |   |          |          |          |
|----|---|---|----------|----------|----------|
| 56 | 8 | 0 | 0.460717 | -0.59037 | 3.073492 |
| 57 | 1 | 0 | 0.306129 | -1.37265 | 0.245938 |
| 58 | 1 | 0 | 2.711559 | 0.407536 | 0.558314 |
| 59 | 1 | 0 | 5.003835 | 0.951498 | 0.430963 |
| 60 | 1 | 0 | -1.35661 | 0.094086 | 1.92341  |
| 61 | 1 | 0 | -3.08545 | -1.5957  | 1.591745 |
| 62 | 1 | 0 | -1.43182 | 4.299763 | -1.06765 |
| 63 | 1 | 0 | 0.211438 | 2.746316 | 2.350303 |
| 64 | 1 | 0 | -5.24028 | -2.69111 | -1.16422 |
| 65 | 1 | 0 | -7.6871  | -2.71068 | -0.82465 |
| 66 | 1 | 0 | -7.53729 | -1.67879 | 0.590988 |
| 67 | 1 | 0 | -6.88271 | -0.88714 | -2.28599 |
| 68 | 1 | 0 | -6.47122 | 1.389199 | -1.41588 |
| 69 | 1 | 0 | -6.74595 | 0.84087  | 0.23646  |
| 70 | 1 | 0 | -4.57728 | -3.95067 | 0.868266 |
| 71 | 1 | 0 | -5.94591 | -3.26512 | 1.770455 |
| 72 | 1 | 0 | -6.23717 | -4.36813 | 0.418183 |
| 73 | 1 | 0 | -9.33046 | -1.02902 | -1.82018 |
| 74 | 1 | 0 | -9.14017 | 0.044186 | -0.42441 |
| 75 | 1 | 0 | -8.83226 | 0.654965 | -2.05835 |
| 76 | 1 | 0 | -3.48233 | 3.787126 | -2.08068 |
| 77 | 1 | 0 | -5.09114 | 3.311742 | -1.5199  |
| 78 | 1 | 0 | -4.14166 | 2.202019 | -2.50371 |
| 79 | 1 | 0 | 0.980289 | 5.303841 | -0.11869 |
| 80 | 1 | 0 | 0.148026 | 6.174095 | 1.167548 |
| 81 | 1 | 0 | 1.351495 | 4.939905 | 1.578029 |
| 82 | 1 | 0 | -2.05274 | 6.405245 | 0.117996 |
| 83 | 1 | 0 | -2.94251 | 5.475674 | 1.339252 |
| 84 | 1 | 0 | -3.50633 | 5.506381 | -0.33942 |
| 85 | 1 | 0 | -3.46774 | 1.549607 | 2.740738 |
| 86 | 1 | 0 | -2.88032 | 3.199608 | 3.003141 |
| 87 | 1 | 0 | -1.92578 | 1.810754 | 3.553032 |
| 88 | 1 | 0 | -1.72062 | -3.27727 | 2.053971 |
| 89 | 1 | 0 | -1.19364 | -2.95948 | -2.19277 |
| 90 | 1 | 0 | 1.231191 | -3.40551 | -1.91806 |
| 91 | 1 | 0 | 0.679738 | -3.72578 | 2.328443 |
| 92 | 1 | 0 | 2.696109 | -1.86742 | 2.958679 |
| 93 | 1 | 0 | 3.181286 | -3.37033 | -0.5079  |
| 94 | 1 | 0 | 3.099015 | -3.74877 | 1.204325 |
| 95 | 1 | 0 | 4.45479  | -2.04228 | -2.19168 |
| 96 | 1 | 0 | 2.14261  | -0.86621 | -2.95773 |
| 97 | 1 | 0 | 6.628622 | 0.37109  | -2.07964 |
| 98 | 1 | 0 | 7.328639 | -1.16525 | -0.24598 |



|     |   |   |          |          |          |
|-----|---|---|----------|----------|----------|
| 99  | 1 | 0 | 8.507395 | 1.502592 | 0.693216 |
| 100 | 1 | 0 | 6.293631 | 2.594482 | -1.51482 |
| 101 | 1 | 0 | 9.173038 | -0.13353 | 2.582241 |
| 102 | 1 | 0 | 9.117882 | -1.46778 | 1.411693 |
| 103 | 1 | 0 | 10.35664 | -0.202   | 1.281547 |
