# Supplementary figures and images for: Didymorenloids A and B, two polycyclic cyclopenta[b]fluorene-type alkaloids with anti-hepatoma activity from the mangrove endophytic fungus Didymella sp. CYSK-4
Source: Royal Society of Chemistry journal article supplement (doi:10.1039/d3qo01917a), 2024-01-01

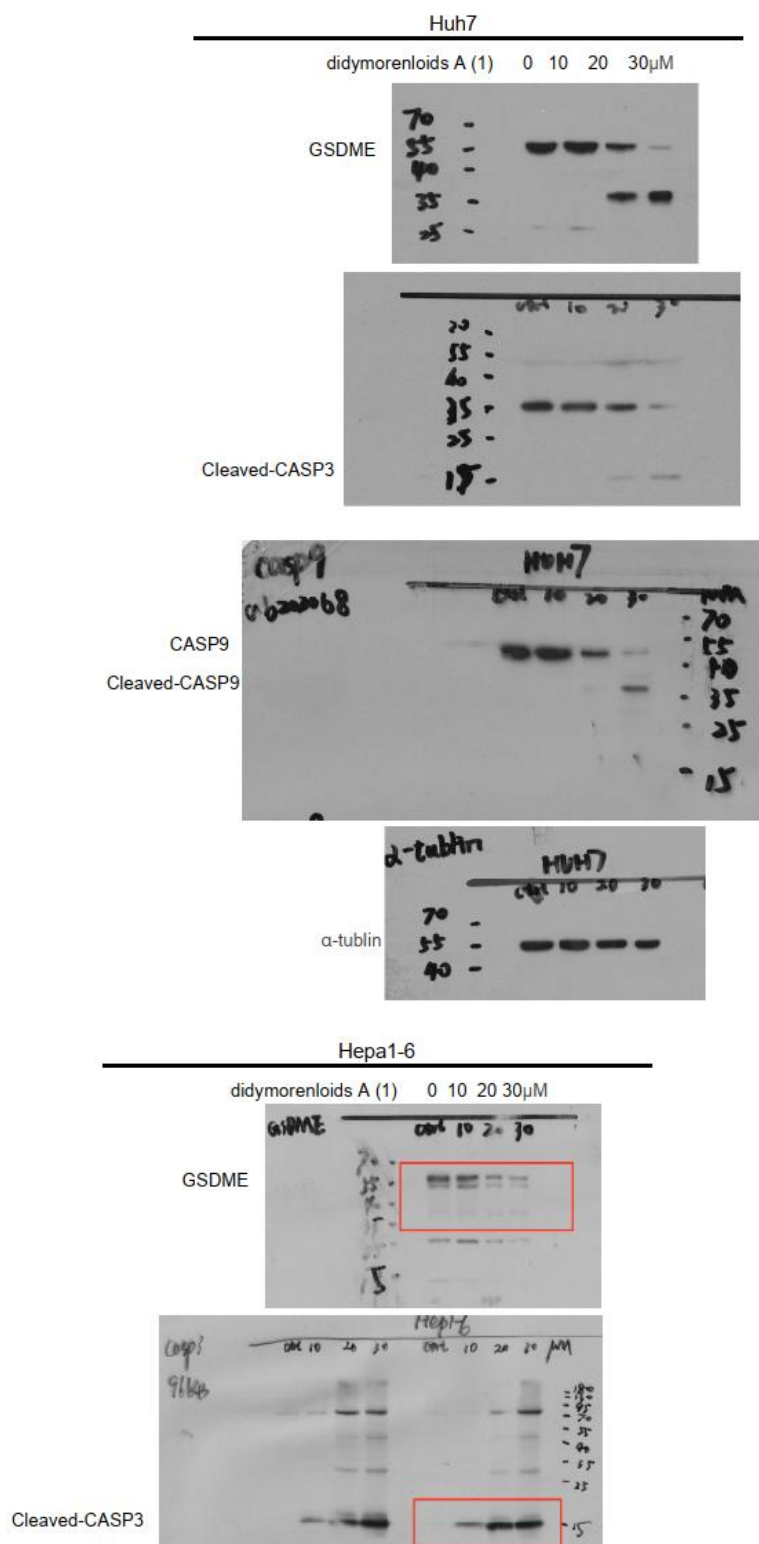

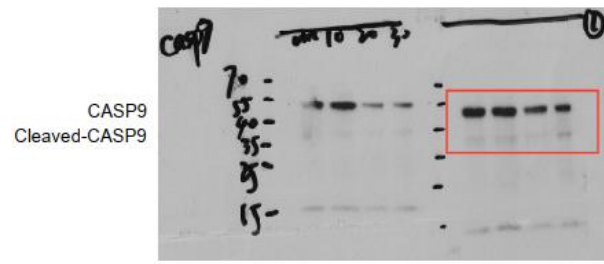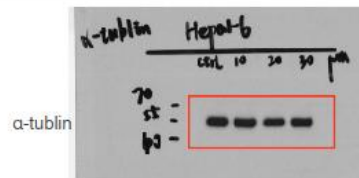

Supplement: d3qo01917a1.pdf [file d3qo01917a1.pdf]
